# Supplementary material for: Biocontrol Effect of Clonostachys rosea on Fusarium graminearum Infection and Mycotoxin Detoxification in Oat (Avena sativa)
Source: MDPI journal article supplement (doi:10.3390/plants12030500), 2023-01-21
Supplement: s1 [file s1]

Supplementary Table S2. **MRM transitions and retention times.**

| Name                          | Short Name | RT (min) | Precursor | Product | CE |
|-------------------------------|------------|----------|-----------|---------|----|
| Deoxynivalenol-3-glucoside    | DON_3_Glu  | 2.10     | 459.20    | 297.1   | 10 |
| Deoxynivalenol-3-glucoside    | DON_3_Glu  | 2.10     | 459.20    | 249.1   | 20 |
| Deoxynivalenol                | DON        | 2.15     | 297.14    | 249.1   | 10 |
| Deoxynivalenol                | DON        | 2.15     | 297.14    | 231.0   | 20 |
| Deoxynivalenol-13C15          | DON-IS     | 2.15     | 312.00    | 263.0   | 15 |
| Deoxynivalenol-13C15          | DON-IS     | 2.15     | 312.00    | 245.1   | 20 |
| Caffeine-13C3                 | Caffein-IS | 2.20     | 198.10    | 140.0   | 20 |
| 3-Acetyl-Deoxynivalenol-13C17 | 3_AcDON-IS | 2.55     | 356.00    | 245.0   | 15 |
| Zearalenone                   | ZEA        | 3.40     | 317.10    | 273.1   | 18 |
| Zearalenone                   | ZEA        | 3.40     | 317.10    | 175.1   | 26 |
| Zearalenone-13C18             | ZEA-IS     | 3.40     | 334.80    | 183.8   | 26 |
