# Supplementary material for: Biocontrol Effect of Clonostachys rosea on Fusarium graminearum Infection and Mycotoxin Detoxification in Oat (Avena sativa)
Source: MDPI journal article supplement (doi:10.3390/plants12030500), 2023-01-21
Supplement: s1 [file s1]

**Supplementary Table S1. Primers and probes used in this work:**

| gene              | gene designation in cv.Sang genome                                                           | primer/probe name                                | sequence                                                                                                                  |
|-------------------|----------------------------------------------------------------------------------------------|--------------------------------------------------|---------------------------------------------------------------------------------------------------------------------------|
| Tubulin- $\alpha$ | AVESA.00010b.r2.7CG0700360.1                                                                 | Tub-a forward<br>Tub-a reverse<br>Tub-a probe    | GAG GTG GAA CTG GCT CTG<br>GAC ACT GTT GTA TGG CTC AAC<br>/5HEX/TCA CCT CAG /ZEN/GTC TCC ACC TCT GTT /3IABkFQ/            |
| AsUGT1            | AVESA.00010b.r2.6AG1068650.1                                                                 | AsUGT1 forward<br>AsUGT1 reverse<br>AsUGT1 probe | GTG GAT GGA ACT CAA CAT TGG AG<br>GGT CAG CCC AAT CTG GAA TAC<br>/56-FAM/CCG TTG CTA /ZEN/GCG GTG TAC CTC TTG /3IABkFQ/   |
| AsUGT2            | AVESA.00010b.r2.6AG1068570.1                                                                 | AsUGT2 forward<br>AsUGT2 reverse<br>AsUGT probe  | GAC CAA CCC ACC ATC TCA AA<br>CCC ATT CAT CAC CTC TCT AAT ACA A<br>/56-FAM/TTT CTC TCT /ZEN/TCC GCA CTC GCA CAC /3IABkFQ/ |
| PR1               | AVESA.00010b.r2.7AG1201740.1<br>AVESA.00010b.r2.UnG1401040.1                                 | PR1 forward<br>PR1 reverse<br>PR1 probe          | TGC AAG CTC CAG CAC TC<br>GCT GTT GGA CCC ATA GTT GTA<br>/56-FAM/AAC CTGT GGG /ZEN/TCA GCG AGA AGA AT/3IABkFQ/            |
| PR3               | AVESA.00010b.r2.1DG0178620<br>AVESA.00010b.r2.1AG0060060                                     | PR3 forward<br>PR3 reverse<br>PR3 probe          | GGC TAC TGC TTC AAG GAA GA<br>CCA GCT GGT AGT TGG ACT G<br>/56-FAM/ACC AAG GAC /ZEN/GTG GAC CAA TCC AAT/3IABkFQ/          |
| PR4               | AVESA.00010b.r2.4AG0575210<br>AVESA.00010b.r2.4DG0719670                                     | PR4 forward<br>PR4 reverse<br>PR4 probe          | ACT GGA CAC CGT CTT CT<br>CAG TCG ACG AAC TTG TAG TTG A<br>/56-FAM/CAA GAT CGA /ZEN/CAC CAA CGG ACA GGG/3IABkFQ/          |
| PR5               | AVESA.00010b.r2.5DG0992430.1<br>AVESA.00010b.r2.5AG0816180.1                                 | PR5 forward<br>PR5 reverse<br>PR5 probe          | CGA ACT ACT CCC AGT TCT TCA A<br>CAGAGCACGATCTGGTAGTTT<br>/56-FAM/ACG ACC AGA /ZEN/CAA GCA CAT TCA CCT/3IABkFQ/           |
| WRKY23-like       | AVESA.00010b.r2.7DG1345990.1<br>AVESA.00010b.r2.2AG0259040.1<br>AVESA.00010b.r2.6CG1146320.1 | WRKY23 forward<br>WRKY23 reverse<br>WRKY23 probe | CAG AAG GTG ACC AAG GAC AA<br>CGC TGC ACC TTC TTC TTC A<br>/56-FAM/TAC TTC CGG /ZEN/TGC TCC TTC GC/3IABkFQ/               |
| WRKY70-like       | AVESA.00010b.r2.1DG0191960.1<br>AVESA.00010b.r2.1AG0073190.1<br>AVESA.00010b.r2.1CG0105620.1 | WRKY70 forward<br>WRKY70 reverse<br>WRKY70probe  | CGG CGG GAA GAG AAA GTC<br>GTC GTC CAA GCT CTT CAA GT<br>/56-FAM/AGA AAG ACC/ZEN/ CAG CAA TCG TCC GTT/3IABkFQ/            |
