# Supplementary material for: Biocontrol Effect of Clonostachys rosea on Fusarium graminearum Infection and Mycotoxin Detoxification in Oat (Avena sativa)
Source: MDPI journal article supplement (doi:10.3390/plants12030500), 2023-01-21
Supplement: s1 [file s1]

Supplementary Figure S2. Symptoms of *F.graminearum* infection in mature oat

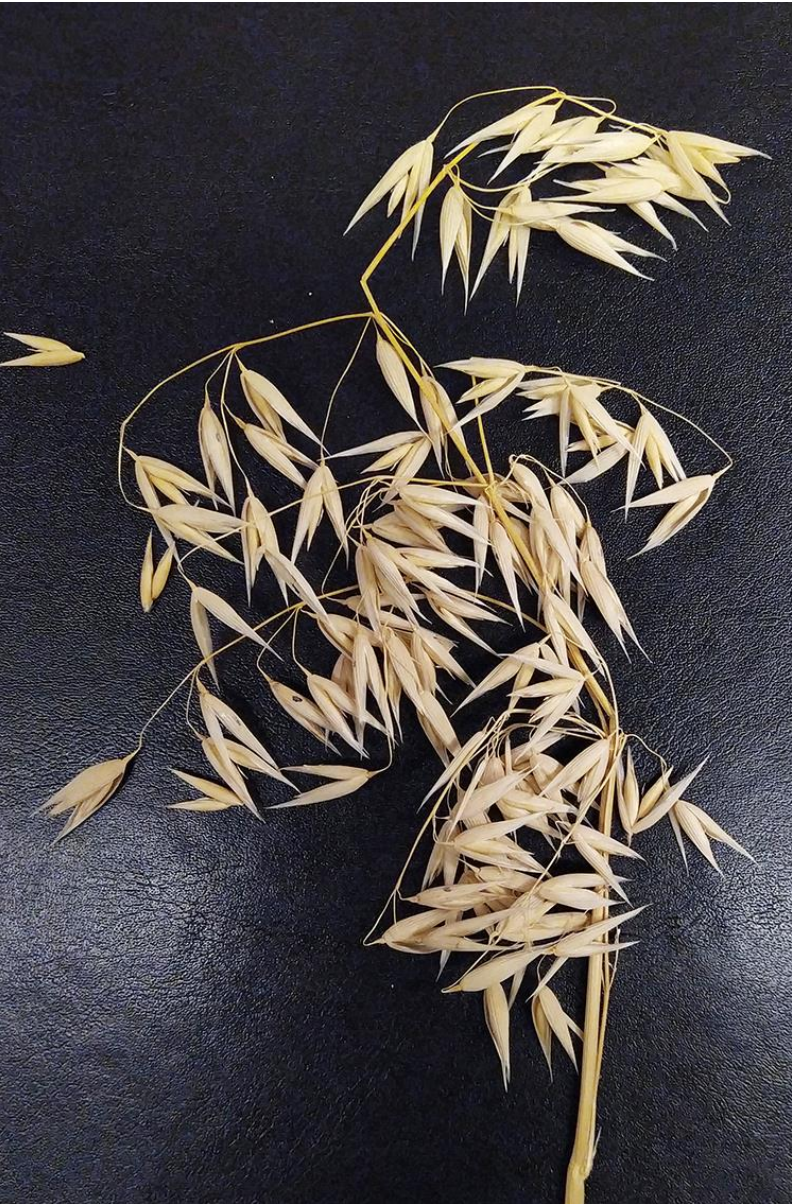

Image 1. An oat panicle

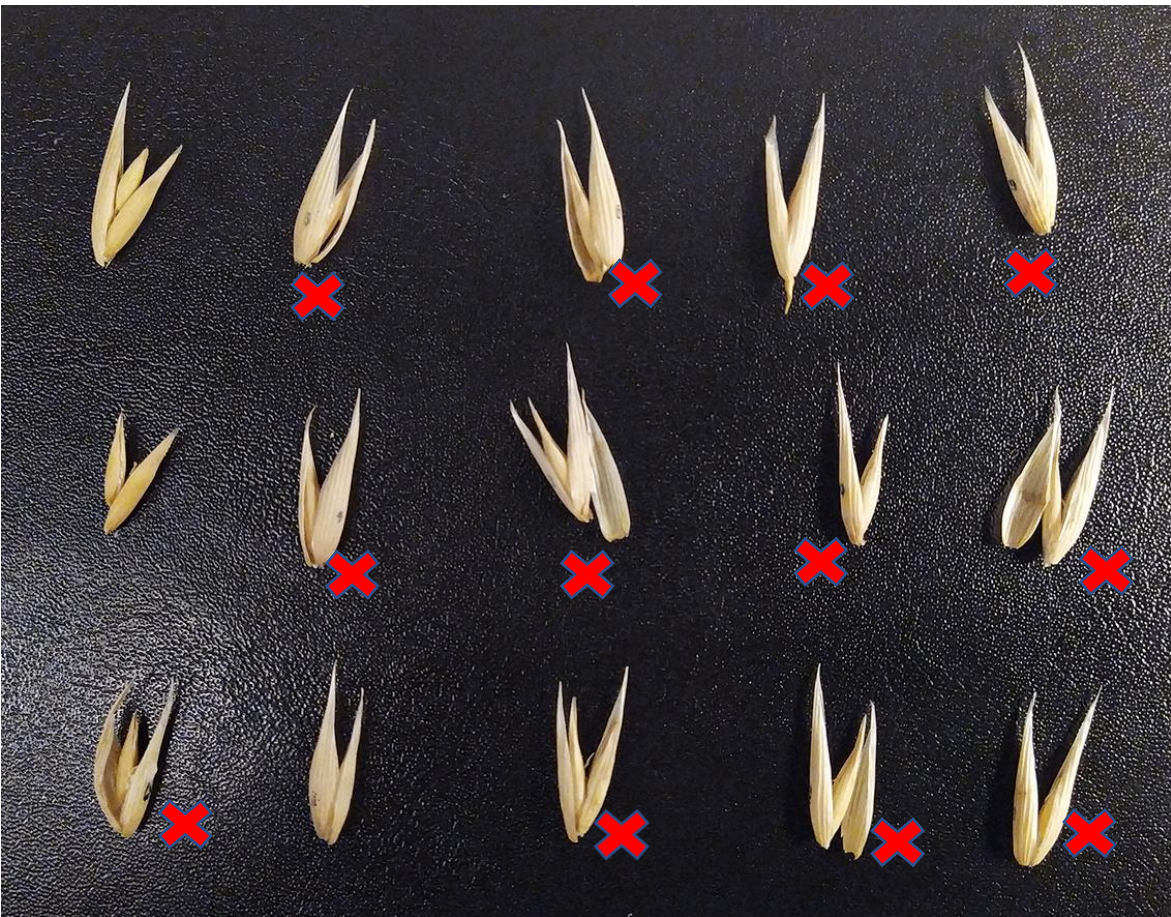

Image 2. Separate spikelets. Marked spikelets contain damaged kernels (one or two), which can be seen only when de-hulled (see image 3) .

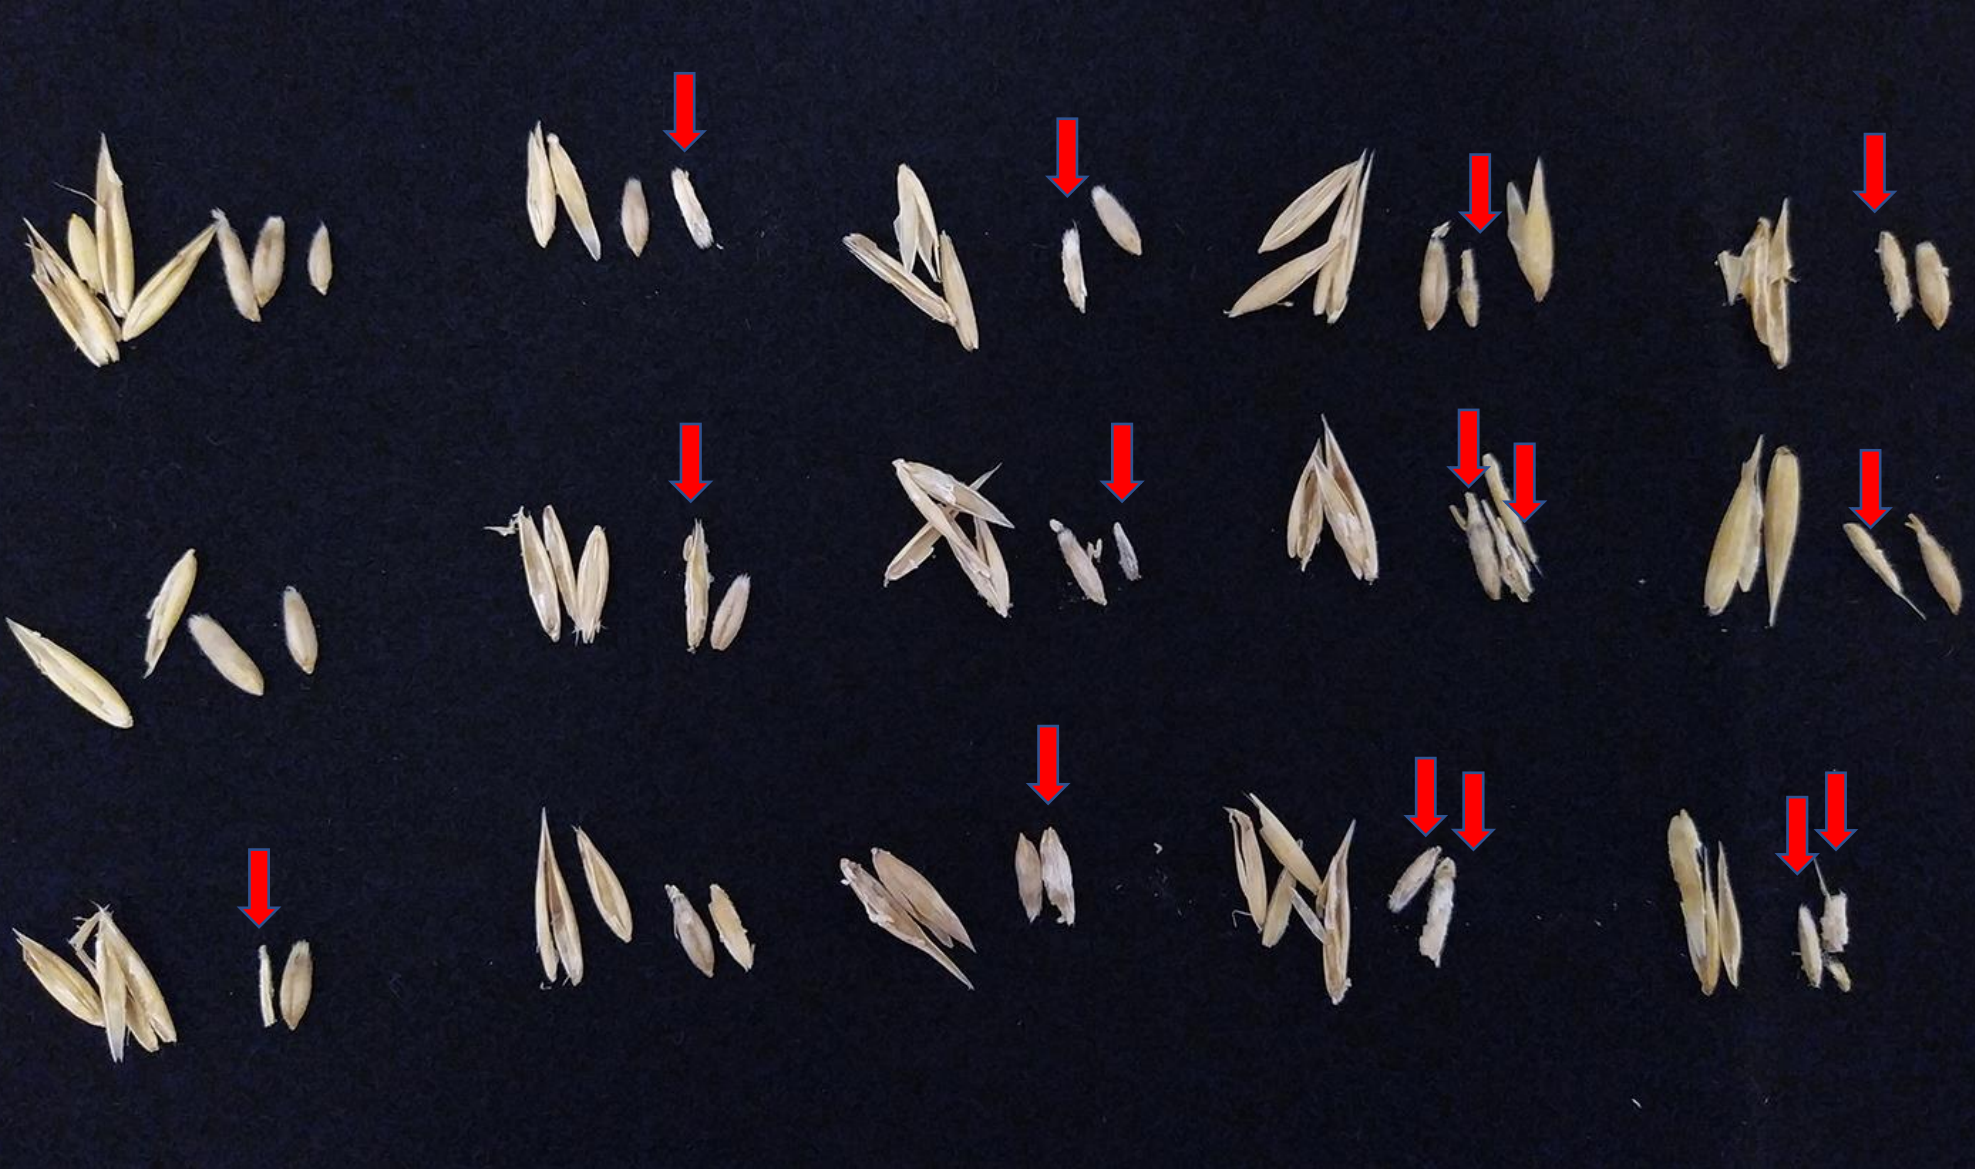

3. De-hulled oat spikelets: mature oat kernels with corresponding hulls (same order as on image 2.)
