# Supplementary material for: Biocontrol Effect of Clonostachys rosea on Fusarium graminearum Infection and Mycotoxin Detoxification in Oat (Avena sativa)
Source: Plants (Basel). 2023 Jan 21;12(3):500. doi: 10.3390/plants12030500 (PMC9918947; doi:10.3390/plants12030500)
Supplement: Supplementary file 1 [file plants-12-00500-s001.zip]

Archive with 4 entries (4 files):
- Supplementary Figure S1.pdf
- Supplementary Figure S2. F.gram symptoms in oat.pdf
- Supplementary Table S1.pdf
- Supplementary Table S2.pdf
