# Supplementary figures and images for: Biocontrol Effect of Clonostachys rosea on Fusarium graminearum Infection and Mycotoxin Detoxification in Oat (Avena sativa)
Source: MDPI journal article supplement (doi:10.3390/plants12030500), 2023-01-21

Supplementary Figure S1. Additional DON metabolites (expressed as “area/mg”)

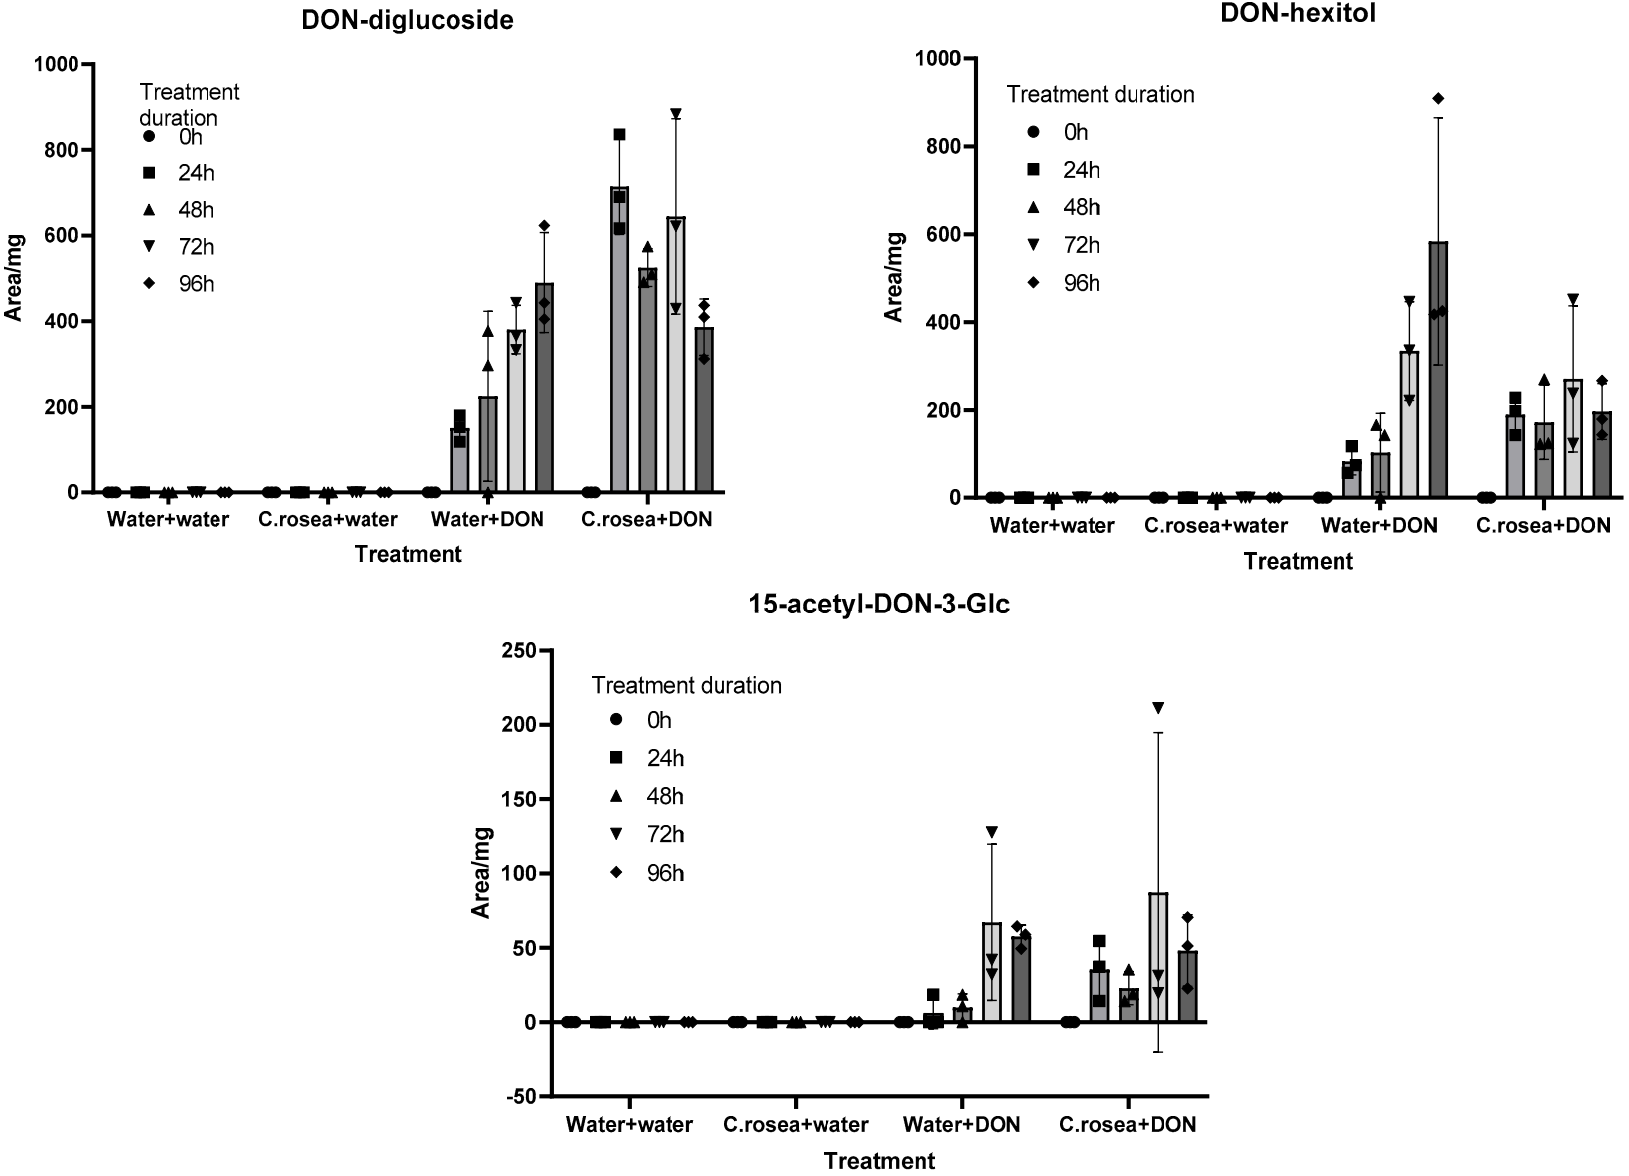

Supplement: s1 [file s1]
